# Supplementary material for: Aggregation in Aqueous Solutions of 2-(Tetrafluoro(trifluoromethyl)-λ6-sulfanyl-ethan-1-ol (CF3SF4-ethanol)): A Comparison with Aqueous Trifluoroethanol and Hexafluoroisopropanol Using Molecular Dynamics Simulations and Dynamic Light Scattering Experiments
Source: PubMed Central journal article supplement — ACS Omega. 2023 Aug 10;8(33):30037–47. doi: 10.1021/acsomega.3c02019 (PMC10448670; doi:10.1021/acsomega.3c02019), 2023-08-10
Supplement: ao3c02019_si_001.pdf [file ao3c02019_si_001.pdf]

## Supporting Information

**Title:** Aggregation in aqueous solutions of 2-(tetrafluoro(trifluoromethyl)- $\lambda^6$ -sulfanyl-ethan-1-ol (CF<sub>3</sub>SF<sub>4</sub>-ethanol): A comparison with aqueous trifluoroethanol and hexafluoroisopropanol using molecular dynamics simulations and dynamic light scattering experiments.

**Authors:** Samadrita Biswas<sup>†1</sup>, Simi Kaur<sup>†1,2</sup>, Christopher A. Myers<sup>2,3</sup>, Alan A. Chen<sup>\*1,2</sup> and John T. Welch<sup>\*1</sup>

<sup>1</sup>Department of Chemistry, University at Albany, State University of New York, 1400 Washington Ave, Albany, NY 12222, USA

<sup>2</sup>RNA Institute, University at Albany, State University of New York, 1400 Washington Ave, Albany, NY 12222, USA

<sup>3</sup>Department of Physics, University at Albany, State University of New York, 1400 Washington Ave, Albany, NY 12222, USA

† equal contributions

\* corresponding author

## Table of Contents

### General Computational information

|                                                                                                   |      |
|---------------------------------------------------------------------------------------------------|------|
| Table S1. Parameters for bonds, angles and dihedrals for CF <sub>3</sub> SF <sub>4</sub> -ethanol | S3-4 |
| Table S2: Parameters for bonds, angles and dihedrals for TFE                                      | S5   |
| Table S3: Parameters for bonds, angles and dihedrals for HFIP                                     | S6   |
| Table S4 : Summary of charges for HFIP conformers                                                 | S7   |
| Table S5 : Summary of charges for TFE conformers                                                  | S7   |
| Table S6: Bonded parameter used for TFE                                                           | S7-8 |
| Table S7: Bonded parameter used for HFIP                                                          | S8   |

### Figures representing Radial Distribution Function for TFE, HFIP and CF<sub>3</sub>SF<sub>4</sub>-ethanol

|                                                                                                                                                          |     |
|----------------------------------------------------------------------------------------------------------------------------------------------------------|-----|
| Figure S1: Radial Distribution Function g (r) for :TFE-TFE                                                                                               | S9  |
| Figure S2: Radial Distribution Function g (r) for : HFIP-HFIP                                                                                            | S10 |
| Figure S3: Radial Distribution Function g (r) for :CF <sub>3</sub> SF <sub>4</sub> -ethanol-CF <sub>3</sub> SF <sub>4</sub> -ethanol                     | S11 |
| Figure S4. RDFs for aqueous mixtures of fluorinated alcohols. RDFs for the O <sub>TFE</sub> -H <sub>Water</sub> and O <sub>TFE</sub> -O <sub>Water</sub> | S12 |

### Presentation of NMR and DART-MS Spectra for trifluoromethyl tetrafluoro-λ<sup>6</sup>-sulfanyl-ethan-1-ol

|                                                                                                |    |
|------------------------------------------------------------------------------------------------|----|
| Figure S5 : NMR spectra of 2-(tetrafluoro(trifluoromethyl)-λ <sup>6</sup> -sulfanyl)ethan-1-ol |    |
| (a) <sup>1</sup> H Nmr spectra of CF <sub>3</sub> SF <sub>4</sub> -ethanol.                    | 13 |
| (b) <sup>19</sup> F Nmr spectra of CF <sub>3</sub> SF <sub>4</sub> -ethanol.                   | 14 |
| (c) HRMS (DART-ESI, m/z,positive) spectrum                                                     | 15 |

**Table S1: Parameters for bonds, angles and dihedrals for CF<sub>3</sub>SF<sub>4</sub>-ethanol**

| <b>Parameter<sup>a</sup></b> | <b>Gauche</b> | <b>Antiperiplanar</b> |
|------------------------------|---------------|-----------------------|
| <i>r</i> (S-C)               | 1.85          | 1.85                  |
| <i>r</i> (S-F)               | 1.68          | 1.68                  |
| <i>r</i> (S-F1)              | 1.68          | 1.68                  |
| <i>r</i> (S-F2)              | 1.69          | 1.65                  |
| <i>r</i> (S-F3)              | 1.72          | 1.65                  |
| <i>r</i> (S-C2)              | 1.98          | 1.92                  |
| <i>r</i> (C-C1)              | 1.53          | 1.53                  |
| <i>r</i> (C-H3)              | 1.09          | 1.09                  |
| <i>r</i> (C-H4)              | 1.09          | 1.09                  |
| <i>r</i> (C1-O)              | 1.41          | 1.42                  |
| <i>r</i> (C1-H1)             | 1.10          | 1.10                  |
| <i>r</i> (C1-H2)             | 1.10          | 1.10                  |
| <i>r</i> (O-H)               | 0.96          | 0.97                  |
| <i>r</i> (C2-F4)             | 1.32          | 1.32                  |
| <i>r</i> (C2-F5)             | 1.31          | 1.32                  |
| <i>r</i> (C2-F6)             | 1.32          | 1.32                  |
| $\theta$ (S-C-C1)            | 115.1         | 115.5                 |
| $\theta$ (S-C-H1)            | 101.97        | 104.05                |
| $\theta$ (S-C-H4)            | 104.16        | 104.8                 |
| $\theta$ (S-C2-F4)           | 108.88        | 108.4                 |
| $\theta$ (S-C2-F5)           | 109.51        | 109.9                 |
| $\theta$ (S-C2-F6)           | 108.19        | 109.9                 |
| $\theta$ (C-S-F)             | 92.64         | 92.30                 |
| $\theta$ (C-S-F1)            | 90.52         | 89.93                 |
| $\theta$ (C-S-F2)            | 90.48         | 90.23                 |
| $\theta$ (C-S-F3)            | 93.51         | 93.12                 |
| $\theta$ (C-S-C2)            | 177.58        | 177.19                |
| $\theta$ (C-C1-O)            | 114.26        | 108.47                |
| $\theta$ (C-C1-H1)           | 104.71        | 110.07                |
| $\theta$ (C-C1-H2)           | 105.83        | 111.28                |
| $\theta$ (C1-C-H3)           | 111.57        | 109.89                |
| $\theta$ (C1-C-H4)           | 111.49        | 112.21                |
| $\theta$ (C1-O-H)            | 108.17        | 108.12                |
| $\theta$ (O-C1-H1)           | 106.09        | 112.06                |
| $\theta$ (O-C1-H2)           | 112.78        | 106.65                |
| $\theta$ (H1-C1-H2)          | 107.36        | 108.18                |

|                           |         |         |
|---------------------------|---------|---------|
| $\theta(\text{H3-C-H4})$  | 111.56  | 109.38  |
| $\theta(\text{F-S-F1})$   | 176.86  | 176.65  |
| $\theta(\text{F-S-F2})$   | 89.24   | 89.31   |
| $\theta(\text{F-S-F3})$   | 89.50   | 90.59   |
| $\theta(\text{F-S-C2})$   | 89.33   | 90.68   |
| $\theta(\text{F1-S-F2})$  | 90.38   | 90.23   |
| $\theta(\text{F2-S-F3})$  | 175.83  | 177.48  |
| $\theta(\text{F1-S-C2})$  | 90.91   | 89.36   |
| $\theta(\text{F1-S-F3})$  | 90.65   | 93.12   |
| $\theta(\text{F2-S-C2})$  | 87.55   | 89.93   |
| $\theta(\text{F3-S-C2})$  | 85.10   | 92.27   |
| $\theta(\text{F4-C2-F5})$ | 110.39  | 109.3   |
| $\theta(\text{F5-C2-F6})$ | 110.17  | 109.34  |
| $\theta(\text{F4-C2-F6})$ | 109.66  | 109.7   |
| $\phi(\text{C-S-C2-F5})$  | -124.18 | -165.71 |
| $\phi(\text{C-S-C2-F4})$  | -4.97   | -46.11  |
| $\phi(\text{C-S-C2-F6})$  | 115.01  | 73.40   |
| $\phi(\text{F3-S-C-C1})$  | 108.51  | -103.63 |
| $\phi(\text{F2-S-C-C1})$  | 162.05  | 76.25   |
| $\phi(\text{F1-S-C-C1})$  | 71.84   | 167.03  |
| $\phi(\text{F-S-C-C1})$   | -18.85  | -14.35  |
| $\phi(\text{S-C-C1-O})$   | 79.03   | -172.43 |
| $\phi(\text{C-C1-O-H})$   | -72.58  | -76.22  |
| $\phi(\text{C2-S-C-C1})$  | 38.16   | 70.14   |
| $\phi(\text{F4-C2-S-F})$  | 52.18   | 44.82   |
| $\phi(\text{F4-C2-S-F1})$ | -38.68  | -45.95  |
| $\phi(\text{F4-C2-S-F3})$ | 141.74  | 133.93  |
| $\phi(\text{F4-C2-S-F2})$ | -128.86 | -136.68 |
| $\phi(\text{F5-C2-S-F})$  | -67.01  | -74.68  |
| $\phi(\text{F5-C2-S-F1})$ | -157.9  | -165.47 |
| $\phi(\text{F5-C2-S-F2})$ | 111.93  | 14.43   |
| $\phi(\text{F5-C2-S-F3})$ | 22.59   | 103.79  |
| $\phi(\text{F6-C2-S-F})$  | 172.18  | 164.35  |
| $\phi(\text{F6-C2-S-F1})$ | 81.03   | 73.57   |
| $\phi(\text{F6-C2-S-F2})$ | -8.87   | -106.53 |
| $\phi(\text{F6-C2-S-F3})$ | -98.27  | -17.16  |

---

a. All distances are reported in Angstroms ( $\text{\AA}$ ), and all angles and dihedrals are in degrees ( $^\circ$ ).

**Table S2: Parameters for bonds, angles and dihedrals for TFE**

| <b>Parameter<sup>a</sup></b> | <b>Gauche</b> | <b>Antiperiplanar</b> |
|------------------------------|---------------|-----------------------|
| $r(\text{C1-F})$             | 1.35          | 1.35                  |
| $r(\text{C1-F2})$            | 1.34          | 1.34                  |
| $r(\text{C-C1})$             | 1.51          | 1.51                  |
| $r(\text{C-H1})$             | 1.10          | 1.10                  |
| $r(\text{C-H2})$             | 1.09          | 1.09                  |
| $r(\text{C-O})$              | 1.40          | 1.40                  |
| $r(\text{O-H})$              | 0.97          | 0.97                  |
| $\theta(\text{F-C1-F1})$     | 107.9         | 107.5                 |
| $\theta(\text{F1-C1-F2})$    | 108.1         | 107.2                 |
| $\theta(\text{F-C1-F2})$     | 107.4         | 107.2                 |
| $\theta(\text{F-C1-C})$      | 109.95        | 110.9                 |
| $\theta(\text{F1-C1-C})$     | 110.75        | 110.4                 |
| $\theta(\text{F2-C1-C})$     | 112.53        | 112.7                 |
| $\theta(\text{C1-C-H1})$     | 107.38        | 107.3                 |
| $\theta(\text{C1-C-H2})$     | 108.42        | 107.85                |
| $\theta(\text{H1-C-O})$      | 113.23        | 112.99                |
| $\theta(\text{H2-C-O})$      | 107.6         | 107.5                 |
| $\theta(\text{C-O-H})$       | 107.5         | 109.4                 |
| $\theta(\text{C1-C-O})$      | 112.41        | 112.4                 |
| $\phi(\text{F-C1-C-O})$      | 58.67         | 180                   |
| $\phi(\text{F1-C1-C-O})$     | -61.33        | 60.76                 |
| $\phi(\text{F2-C1-C-O})$     | 177.79        | -60.76                |
| $\phi(\text{C2-C-O-H})$      | 62.74         | 180                   |

a. All distances are reported in Angstroms (Å), and all angles and dihedrals are in degrees (°).

**Table S3: Parameters for bonds, angles and dihedrals for HFIP**

| Parameter <sup>a</sup>    | Gauche  | Antiperiplanar |
|---------------------------|---------|----------------|
| $r(\text{O-C})$           | 1.39    | 1.39           |
| $r(\text{C-H1})$          | 1.10    | 1.09           |
| $r(\text{C-C1})$          | 1.53    | 1.53           |
| $r(\text{C-C2})$          | 1.53    | 1.53           |
| $r(\text{F-C1})$          | 1.34    | 1.34           |
| $r(\text{F1-C1})$         | 1.33    | 1.33           |
| $r(\text{F2-C1})$         | 1.33    | 1.33           |
| $r(\text{F3-C2})$         | 1.33    | 1.33           |
| $r(\text{F4-C2})$         | 1.33    | 1.33           |
| $r(\text{F5-C2})$         | 1.33    | 1.33           |
| $\theta(\text{C-O-H})$    | 109.14  | 107.5          |
| $\theta(\text{F-C1-C})$   | 107.83  | 110.2          |
| $\theta(\text{H1-C-O})$   | 113.11  | 107.6          |
| $\theta(\text{F1-C1-C})$  | 113.4   | 109.7          |
| $\theta(\text{F2-C1-C})$  | 111.6   | 112.3          |
| $\theta(\text{F-C1-F2})$  | 107.5   | 108.3          |
| $\theta(\text{F-C1-F1})$  | 107.6   | 107.8          |
| $\theta(\text{F1-C1-F2})$ | 108.6   | 108.3          |
| $\theta(\text{C1-C-C2})$  | 113.7   | 113.3          |
| $\theta(\text{C-C2-F3})$  | 110.7   | 110.2          |
| $\theta(\text{C-C2-F4})$  | 112.4   | 109.7          |
| $\theta(\text{C-C2-F5})$  | 109.3   | 112.4          |
| $\theta(\text{F3-C2-F4})$ | 108.4   | 107.8          |
| $\theta(\text{F3-C2-F5})$ | 107.8   | 108.2          |
| $\theta(\text{F4-C2-F5})$ | 108     | 108.2          |
| $\phi(\text{F-C1-C-O})$   | -53.42  | -179.9         |
| $\phi(\text{F1-C1-C-O})$  | 65.52   | 59.5           |
| $\phi(\text{F2-C1-C-O})$  | -171.67 | -59.03         |
| $\phi(\text{F3-C2-C-O})$  | -177.76 | 58.53          |
| $\phi(\text{F4-C2-C-O})$  | -57.02  | -60.02         |
| $\phi(\text{F5-C2-C-O})$  | 63.32   | 179.4          |
| $\phi(\text{F-C1-C-C2})$  | -173.31 | -55.9          |
| $\phi(\text{F1-C1-C-C2})$ | -54.37  | -176.5         |
| $\phi(\text{F2-C1-C-C2})$ | 68.43   | 64.9           |
| $\phi(\text{F3-C2-C-C1})$ | -55.68  | -65.5          |
| $\phi(\text{F4-C2-C-C1})$ | 65.06   | 175.9          |
| $\phi(\text{F5-C2-C-C1})$ | -174.59 | 55.4           |
| $\phi(\text{H-O-C-C1})$   | 58.65   | 62.9           |
| $\phi(\text{H-O-C-C2})$   | -177.83 | -62.9          |
| $\phi(\text{H1-C-O-H})$   | -57.09  | 179.99         |

a. All distances are reported in Angstroms (Å), and all angles and dihedrals are in degrees (°).

**Table S4 : Summary of Charges for HFIP conformers**

| Atom ID | Charges <sup>a</sup> (Gauche) | Charges <sup>a</sup> (antiperiplanar) |
|---------|-------------------------------|---------------------------------------|
| C       | -0.179624                     | -0.220327                             |
| C       | 0.485153                      | 0.401674                              |
| F       | -0.151961                     | -0.133323                             |
| F       | -0.151961                     | -0.133323                             |
| F       | -0.151961                     | -0.133323                             |
| C       | 0.485153                      | 0.401674                              |
| F       | -0.151961                     | -0.133323                             |
| F       | -0.151961                     | -0.133323                             |
| F       | -0.151961                     | -0.133323                             |
| O       | -0.389807                     | -0.443433                             |
| H       | 0.354832                      | 0.4016661                             |
| H       | 0.156059                      | 0.258687                              |

a. Values for partial Charge are presented in atomic units

**Table S5 : Summary of charges for TFE conformers**

| Atom ID | Charges <sup>a</sup> (Gauche) | Charges <sup>a</sup> (Antiperiplanar) |
|---------|-------------------------------|---------------------------------------|
| C       | 0.543783                      | 0.565457                              |
| C       | -0.093684                     | -0.077413                             |
| O       | -0.455792                     | -0.502283                             |
| H       | 0.350009                      | 0.395821                              |
| H       | 0.119999                      | 0.094675                              |
| H       | 0.119999                      | 0.094675                              |
| F       | -0.194771                     | -0.190311                             |
| F       | -0.194771                     | -0.190311                             |
| F       | -0.194771                     | -0.190311                             |

a. Values for partial Charge are presented in atomic units

**Table S6: Bonded parameters used for TFE**

| Bond stretching parameters for CF <sub>3</sub> SF <sub>4</sub> -ethanol used in simulation |              |                                 |
|--------------------------------------------------------------------------------------------|--------------|---------------------------------|
| Bond                                                                                       | $r_{eq}$ (Å) | $k_r$ (KJ/mol.nm <sup>2</sup> ) |
| C-C                                                                                        | 1.53         | 253632.1                        |
| C1-H1                                                                                      | 1.10         | 281081.0                        |
| C1-O                                                                                       | 1.40         | 262846.0                        |
| C-F                                                                                        | 1.34         | 304431.0                        |
| O-H                                                                                        | 0.96         | 309287.4                        |

Bond angle parameters used in simulation

| Angle   | $\theta_{eq}$ / degree | $k_{\theta}$ (KJ/mol.rad <sup>2</sup> ) |
|---------|------------------------|-----------------------------------------|
| F-C-F   | 109.06                 | 644.336                                 |
| F-C-C1  | 109.24                 | 418.400                                 |
| C-C1-O  | 110.19                 | 418.440                                 |
| C-C1-H1 | 109.56                 | 313.800                                 |
| C1-O-H  | 109.5                  | 460.250                                 |
| O-C1-H1 | 110.26                 | 292.880                                 |

  

| Dihedral parameters used in simulations (Ryckaert-Bellemans type) |          |          |         |          |
|-------------------------------------------------------------------|----------|----------|---------|----------|
| Dihedral                                                          | $C_0$    | $C_1$    | $C_2$   | $C_3$    |
| H3-C-C1-F                                                         | 0.65689  | 1.97066  | 0.0     | -2.62755 |
| O-C1-C-H3                                                         | 1.40600  | -1.04600 | 0.0     | 0.0      |
| H-O-C1-H2                                                         | 0.995779 | 2.98736  | 0.0     | -3.98316 |
| C-C1-O-H                                                          | 0.26778  | -9.41032 | 9.10021 | 0.0      |

Table S7. Bonded parameters used for HFIP

| Bond stretching parameters for CF3SF4-ethanol used in simulation |              |                                 |
|------------------------------------------------------------------|--------------|---------------------------------|
| Bond                                                             | $r_{eq}$ (Å) | $k_r$ (KJ/mol.nm <sup>2</sup> ) |
| C-C1                                                             | 1.53         | 253632.1                        |
| C-H1                                                             | 1.09         | 281081.0                        |
| C-O                                                              | 1.40         | 262846.0                        |
| C1-F                                                             | 1.34         | 304431.0                        |
| O-H                                                              | 0.96         | 309287.4                        |

  

| Bond angle parameters used in simulation |                        |                                         |
|------------------------------------------|------------------------|-----------------------------------------|
| Angle                                    | $\theta_{eq}$ / degree | $k_{\theta}$ (KJ/mol.rad <sup>2</sup> ) |
| F-C1-F1                                  | 109.06                 | 644.336                                 |
| F-C1-C                                   | 109.24                 | 418.400                                 |
| C1-C-O                                   | 109.50                 | 418.440                                 |
| C1-C-H1                                  | 109.56                 | 313.800                                 |
| C-O-H                                    | 109.50                 | 460.250                                 |
| O-C-H1                                   | 110.26                 | 292.880                                 |

  

| Dihedral parameters used in simulations (Ryckaert-Bellemans type) |         |          |         |          |
|-------------------------------------------------------------------|---------|----------|---------|----------|
| Dihedral                                                          | $C_0$   | $C_1$    | $C_2$   | $C_3$    |
| H1-C-C1-F                                                         | 0.79496 | -0.79496 | 0.0     | 0.0      |
| C1-C-C2-F3                                                        | 0.65084 | 1.95253  | 0.0     | -2.60338 |
| H-O-C-H1                                                          | 0.69733 | 2.09200  | 0.0     | -2.78933 |
| C2-C-O-H                                                          | 0.26778 | -9.41032 | 9.10021 | 0.0      |



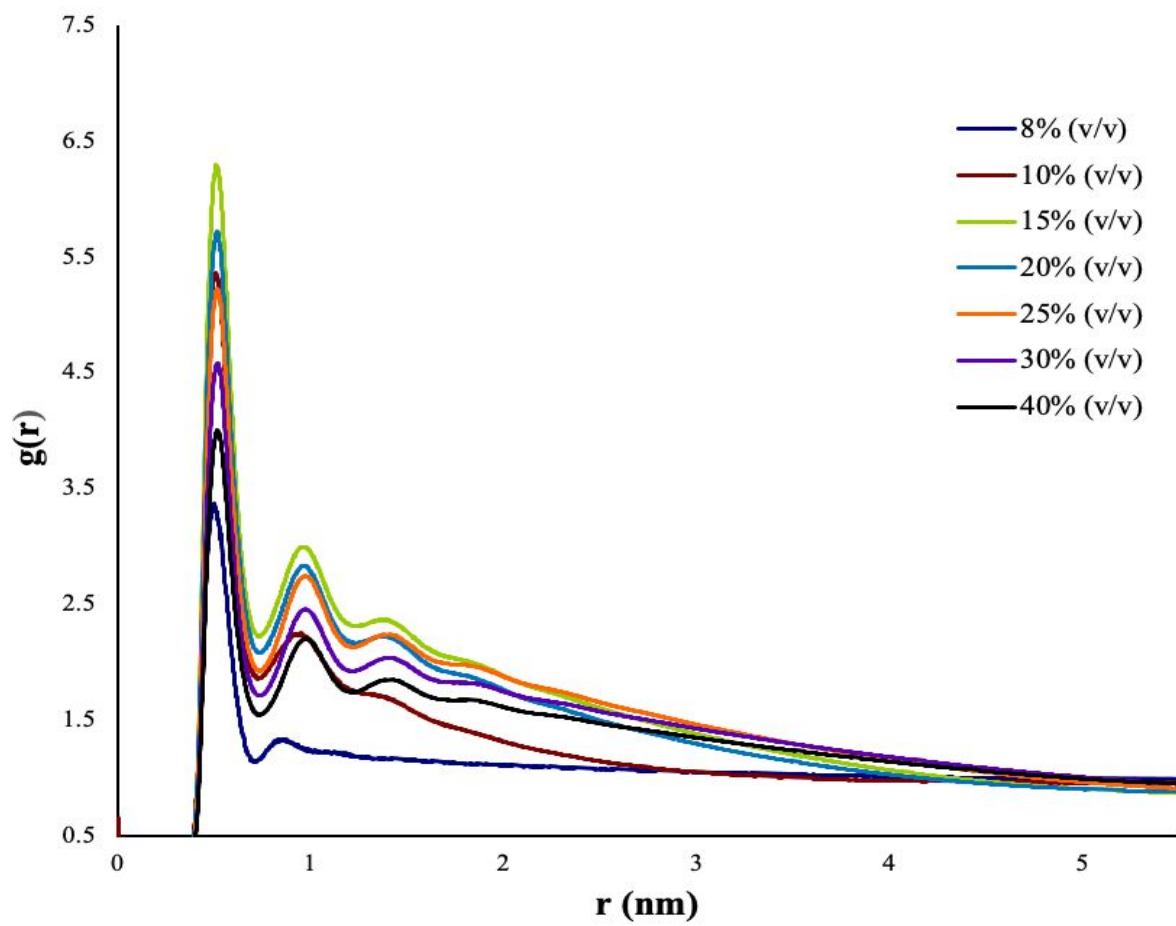

**Figure S1:** Radial Distribution Function  $g(r)$  for TFE-TFE

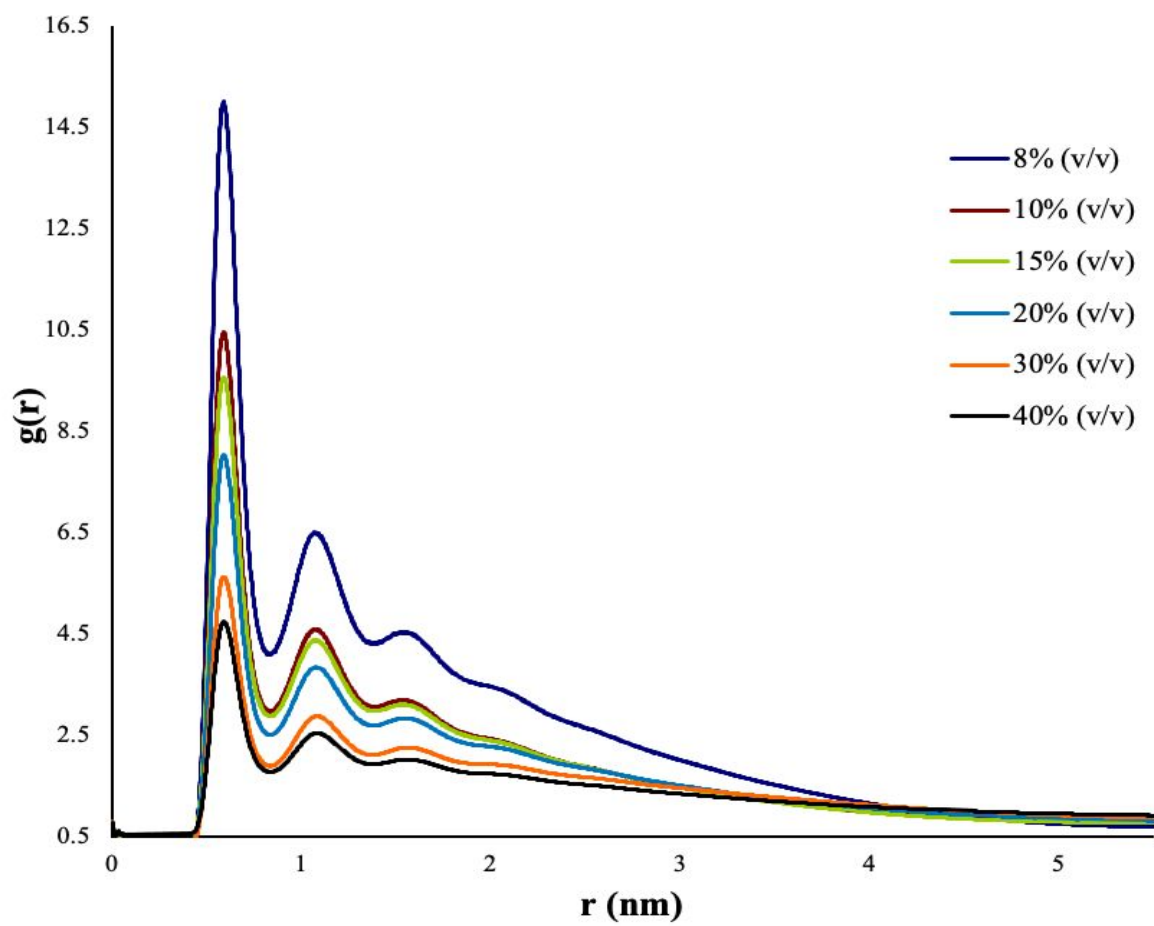

**Figure S2:** Radial Distribution Function  $g(r)$  for HFIP-HFIP

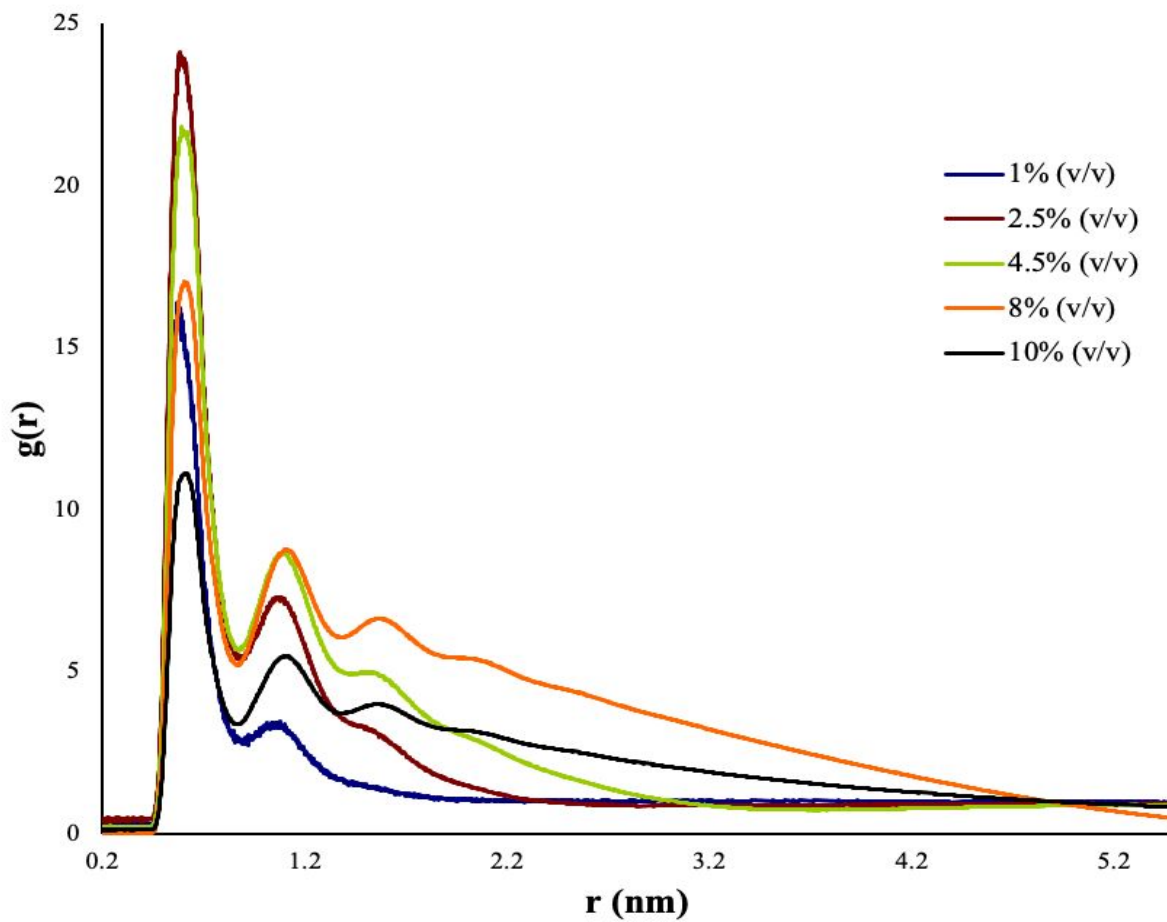

**Figure S3:** Radial Distribution Function  $g(r)$  for  $CF_3SF_4$ -ethanol- $CF_3SF_4$ -ethanol

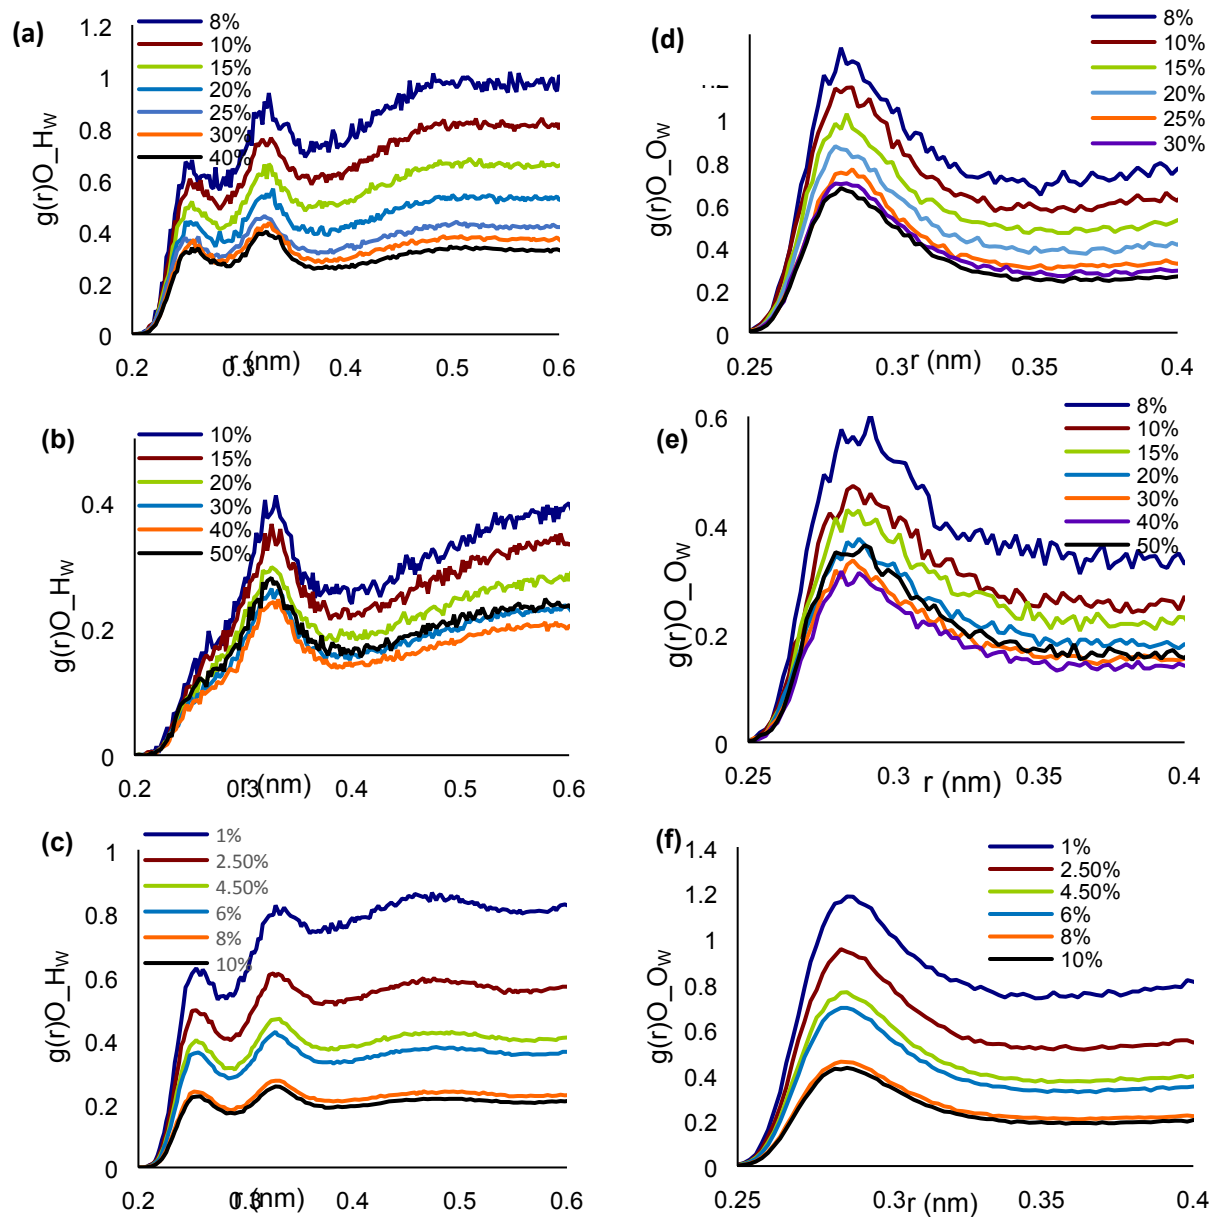

**Figure S4.** RDFs for aqueous mixtures of fluorinated alcohols. Presented above are the RDFs for the  $O_{\text{TFE}}\text{-}H_{\text{Water}}$  distribution in TFE (a), HFIP (b) and  $\text{CF}_3\text{SF}_4\text{-ethanol}$  (c) and for the  $O_{\text{TFE}}\text{-}O_{\text{Water}}$  distribution in TFE (d) HFIP, (e) and  $\text{CF}_3\text{SF}_4\text{-ethanol}$  (f).

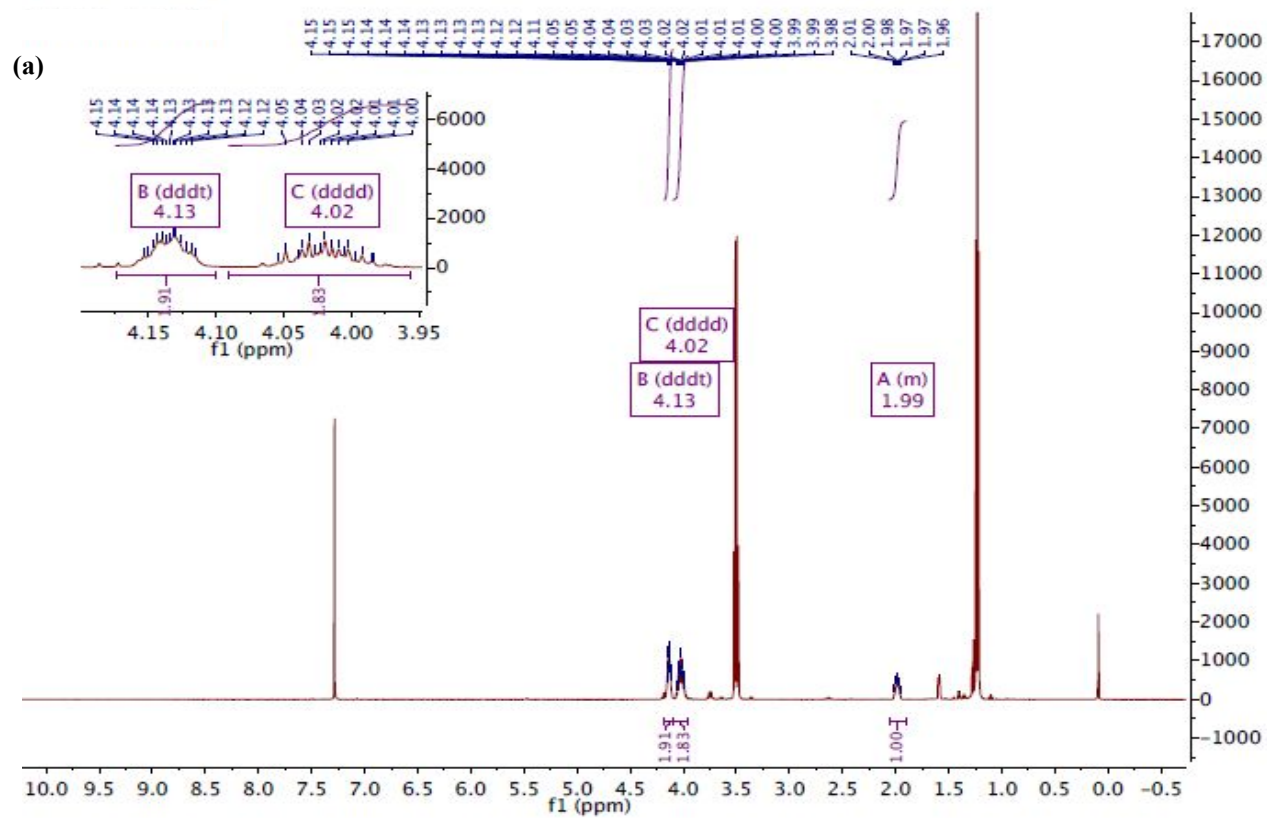

Figure S5 : (a)  $^1\text{H}$  Nmr spectrum of 2-(tetrafluoro(trifluoromethyl)- $\lambda^6$ -sulfanyl)ethan-1-ol

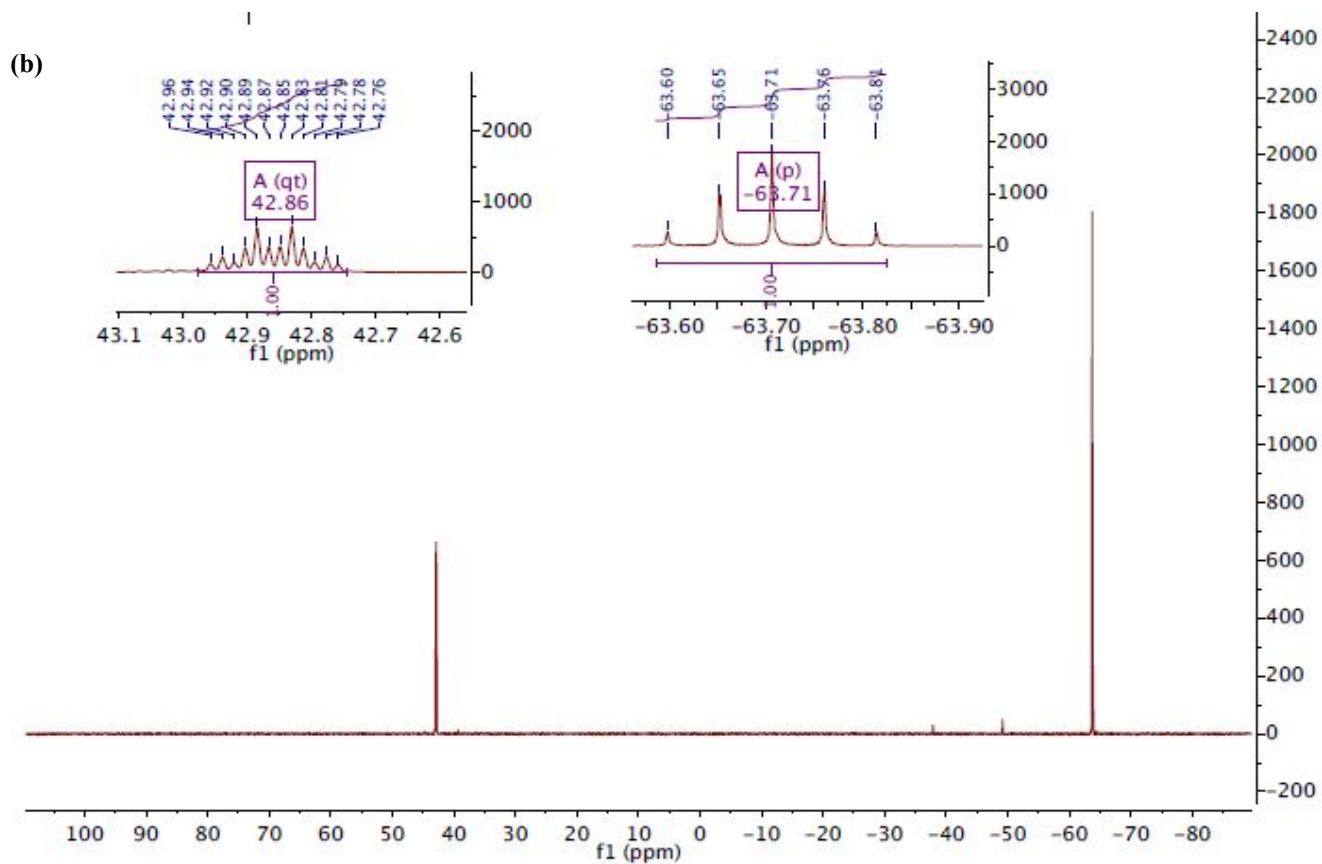

**Figure S5 :** (b)  $^{19}\text{F}$  Nmr spectra of 2-(tetrafluoro(trifluoromethyl)- $\lambda^6$ -sulfanyl)ethan-1-ol

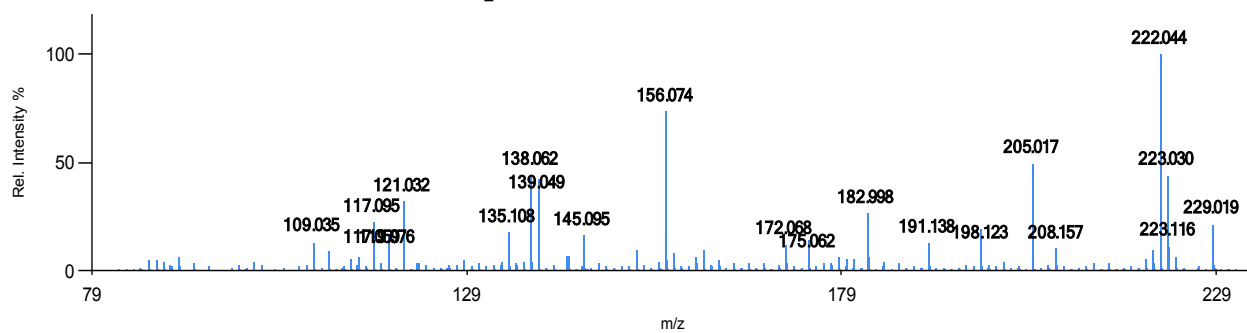

**Figure S5** : (c) HRMS (DART-ESI, m/z, positive) spectrum of 2-(tetrafluoro(trifluoromethyl)-λ<sup>6</sup>-sulfanyl)ethan-1-ol
